# Supplementary material for: Novel ditopic 2-mercaptothiazoles and their sodium salts: synthesis, structural diversity and luminescence
Source: Royal Society of Chemistry journal article supplement (doi:10.1039/d2nj02746a), 2022-01-01
Supplement: d2nj02746a1.pdf [file d2nj02746a1.pdf]

## Novel Ditopic 2-Mercaptothiazoles and their Sodium Salts: Synthesis, Structural Diversity and Luminescence

Anton F. Rogozhin,<sup>a</sup> Vasily A. Ilichev,<sup>\*a</sup> Anatoly A. Fagin,<sup>a</sup> Roman V. Rummyantsev,<sup>a</sup> Georgy K. Fukin<sup>a</sup> Artem N. Yablonskiy,<sup>b</sup> Boris A. Andreev<sup>b</sup> and Mikhail N. Bochkarev<sup>a</sup>

- 
- <sup>a.</sup> *G. A. Razuvaev Institute of Organometallic Chemistry of Russian Academy of Sciences, Tropinina 49, 603950 Nizhny Novgorod, Russian Federation.*
- <sup>b.</sup> *Institute for Physics of Microstructures of Russian Academy of Sciences, 7 ul. Akademicheskaya, 603950 Nizhny Novgorod, Russian Federation.*

### Table of Contents

|                                                           |    |
|-----------------------------------------------------------|----|
| X-ray crystallography                                     | 2  |
| Absorption and PL                                         | 6  |
| Steady-state, fluorescence and phosphorescence PL spectra | 7  |
| NMR                                                       | 8  |
| Mass-spectroscopy                                         | 12 |
| FTIR                                                      | 14 |

**Table 1S.** Details of crystallographic, collection and refinement data for **1**, Na<sub>2</sub>dmbt(DME)<sub>4</sub>, Na<sub>2</sub>L<sup>2</sup>(DME)<sub>4</sub>, Na<sub>2</sub>L<sup>5</sup>(DME)<sub>4</sub>, [Na<sub>2</sub>L<sup>4</sup>(THF)<sub>4</sub>]<sub>n</sub> and [Na<sub>2</sub>L<sup>4</sup>(DME)<sub>2</sub>]<sub>n</sub>.

| Complex                                         | <b>1</b>                                                                                    | Na <sub>2</sub> dmbt(DME) <sub>4</sub>                                                       | Na <sub>2</sub> L <sup>2</sup> (DME) <sub>4</sub>                                                           | Na <sub>2</sub> L <sup>5</sup> (DME) <sub>4</sub>                                            | [Na <sub>2</sub> L <sup>4</sup> (THF) <sub>4</sub> ] <sub>n</sub>                            | [Na <sub>2</sub> L <sup>4</sup> (DME) <sub>2</sub> ] <sub>n</sub>                            |
|-------------------------------------------------|---------------------------------------------------------------------------------------------|----------------------------------------------------------------------------------------------|-------------------------------------------------------------------------------------------------------------|----------------------------------------------------------------------------------------------|----------------------------------------------------------------------------------------------|----------------------------------------------------------------------------------------------|
| Empirical formula                               | C <sub>12</sub> H <sub>12</sub> F <sub>2</sub> N <sub>2</sub> O <sub>2</sub> S <sub>4</sub> | C <sub>24</sub> H <sub>42</sub> N <sub>2</sub> Na <sub>2</sub> O <sub>8</sub> S <sub>4</sub> | C <sub>24</sub> H <sub>40</sub> F <sub>2</sub> N <sub>2</sub> Na <sub>2</sub> O <sub>8</sub> S <sub>4</sub> | C <sub>28</sub> H <sub>44</sub> N <sub>2</sub> Na <sub>2</sub> O <sub>8</sub> S <sub>4</sub> | C <sub>24</sub> H <sub>34</sub> N <sub>2</sub> Na <sub>2</sub> O <sub>4</sub> S <sub>4</sub> | C <sub>16</sub> H <sub>22</sub> N <sub>2</sub> Na <sub>2</sub> O <sub>4</sub> S <sub>4</sub> |
| Formula weight                                  | 382.48                                                                                      | 660.81                                                                                       | 696.80                                                                                                      | 710.87                                                                                       | 588.75                                                                                       | 480.57                                                                                       |
| Temperature [K]                                 | 100(2)                                                                                      | 100(2)                                                                                       | 100(2)                                                                                                      | 200(2)                                                                                       | 100(2)                                                                                       | 100(2)                                                                                       |
| Crystal system                                  | Triclinic                                                                                   | Monoclinic                                                                                   | Monoclinic                                                                                                  | Triclinic                                                                                    | Orthorhombic                                                                                 | Monoclinic                                                                                   |
| Space group                                     | P-1                                                                                         | P2 <sub>1</sub> /n                                                                           | P2 <sub>1</sub> /n                                                                                          | P-1                                                                                          | Pbca                                                                                         | P2 <sub>1</sub> /c                                                                           |
| Unit cell dimensions                            |                                                                                             |                                                                                              |                                                                                                             |                                                                                              |                                                                                              |                                                                                              |
| a[Å]                                            | 8.2628(6)                                                                                   | 17.2189(7)                                                                                   | 17.3479(6)                                                                                                  | 8.7022(4)                                                                                    | 15.2774(6)                                                                                   | 7.6815(3)                                                                                    |
| b[Å]                                            | 9.9330(5)                                                                                   | 9.9368(4)                                                                                    | 10.1004(3)                                                                                                  | 8.8311(4)                                                                                    | 11.0794(4)                                                                                   | 13.6933(5)                                                                                   |
| c[Å]                                            | 10.3705(6)                                                                                  | 20.0201(8)                                                                                   | 19.6252(6)                                                                                                  | 12.7825(6)                                                                                   | 16.7363(7)                                                                                   | 10.3983(4)                                                                                   |
| α[°]                                            | 93.322(5)                                                                                   | 90                                                                                           | 90                                                                                                          | 79.4431(15)                                                                                  | 90                                                                                           | 90                                                                                           |
| β[°]                                            | 107.069(6)                                                                                  | 99.5650(10)                                                                                  | 98.0100(10)                                                                                                 | 84.4180(15)                                                                                  | 90                                                                                           | 101.9643(11)                                                                                 |
| γ[°]                                            | 103.852(5)                                                                                  | 90                                                                                           | 90                                                                                                          | 77.5543(15)                                                                                  | 90                                                                                           | 90                                                                                           |
| Volume [Å <sup>3</sup> ]                        | 782.42(9)                                                                                   | 3377.8(2)                                                                                    | 3405.19(19)                                                                                                 | 941.30(8)                                                                                    | 2832.86(19)                                                                                  | 1069.99(7)                                                                                   |
| Z                                               | 2                                                                                           | 4                                                                                            | 4                                                                                                           | 1                                                                                            | 4                                                                                            | 2                                                                                            |
| Calculated density [Mg/m <sup>3</sup> ]         | 1.623                                                                                       | 1.299                                                                                        | 1.359                                                                                                       | 1.254                                                                                        | 1.380                                                                                        | 1.492                                                                                        |
| Absorption coefficient [mm <sup>-1</sup> ]      | 0.634                                                                                       | 0.351                                                                                        | 0.360                                                                                                       | 0.320                                                                                        | 0.399                                                                                        | 0.510                                                                                        |
| F(000)                                          | 392                                                                                         | 1400                                                                                         | 1464                                                                                                        | 376                                                                                          | 1240                                                                                         | 500                                                                                          |
| Crystal size [mm <sup>3</sup> ]                 | 0.40×0.10×0.05                                                                              | 0.12×0.09×0.08                                                                               | 0.35×0.23×0.17                                                                                              | 0.29×0.23×0.07                                                                               | 0.21×0.17×0.08                                                                               | 0.28×0.17×0.08                                                                               |
| θ [°]                                           | 3.174 – 26.999                                                                              | 2.063 – 27.134                                                                               | 2.096 – 29.575                                                                                              | 2.401 – 28.695                                                                               | 2.576 – 30.117                                                                               | 2.494 – 28.698                                                                               |
| Reflections collected / unique                  | 6815 / 3414                                                                                 | 42795 / 7473                                                                                 | 51628 / 9531                                                                                                | 13963 / 4836                                                                                 | 46605 / 4153                                                                                 | 16878 / 2767                                                                                 |
| R(int)                                          | 0.0299                                                                                      | 0.0415                                                                                       | 0.0357                                                                                                      | 0.0281                                                                                       | 0.0395                                                                                       | 0.0314                                                                                       |
| Final R indices [I>2σ(I)]                       | R <sub>1</sub> =0.0352,<br>wR <sub>2</sub> =0.0844                                          | R <sub>1</sub> =0.0337,<br>wR <sub>2</sub> =0.0694                                           | R <sub>1</sub> =0.0329,<br>wR <sub>2</sub> =0.0684                                                          | R <sub>1</sub> =0.0419,<br>wR <sub>2</sub> =0.0957                                           | R <sub>1</sub> =0.0308,<br>wR <sub>2</sub> =0.0724                                           | R <sub>1</sub> =0.0271,<br>wR <sub>2</sub> =0.0609                                           |
| R indices (all data)                            | R <sub>1</sub> =0.0475,<br>wR <sub>2</sub> =0.0891                                          | R <sub>1</sub> =0.0505,<br>wR <sub>2</sub> =0.0749                                           | R <sub>1</sub> =0.0483,<br>wR <sub>2</sub> =0.0745                                                          | R <sub>1</sub> =0.0608,<br>wR <sub>2</sub> =0.1069                                           | R <sub>1</sub> =0.0437,<br>wR <sub>2</sub> =0.0777                                           | R <sub>1</sub> =0.0354,<br>wR <sub>2</sub> =0.0640                                           |
| S                                               | 1.035                                                                                       | 1.025                                                                                        | 1.013                                                                                                       | 1.030                                                                                        | 1.027                                                                                        | 1.071                                                                                        |
| Largest diff. peak and hole [e/Å <sup>3</sup> ] | 0.694/-0.326                                                                                | 0.289/-0.254                                                                                 | 0.404/-0.298                                                                                                | 0.249/-0.289                                                                                 | 0.421/-0.300                                                                                 | 0.435/-0.271                                                                                 |

**Table 2S.** The selected bond lengths (Å) and angles (°) in the compounds **1**, Na<sub>2</sub>dmbt(DME)<sub>4</sub>, Na<sub>2</sub>L<sup>2</sup>(DME)<sub>4</sub>, Na<sub>2</sub>L<sup>5</sup>(DME)<sub>4</sub>, [Na<sub>2</sub>L<sup>4</sup>(THF)<sub>4</sub>]<sub>n</sub> and [Na<sub>2</sub>L<sup>4</sup>(DME)<sub>2</sub>]<sub>n</sub>.

| Bonds, Å            | <b>1</b> | Na <sub>2</sub> dmbt(DME) <sub>4</sub> | Na <sub>2</sub> L <sup>2</sup> (DME) <sub>4</sub> | Na <sub>2</sub> L <sup>5</sup> (DME) <sub>4</sub> | [Na <sub>2</sub> L <sup>4</sup> (THF) <sub>4</sub> ] <sub>n</sub> | [Na <sub>2</sub> L <sup>4</sup> (DME) <sub>2</sub> ] <sub>n</sub> |
|---------------------|----------|----------------------------------------|---------------------------------------------------|---------------------------------------------------|-------------------------------------------------------------------|-------------------------------------------------------------------|
| Na(1)-S(1)          | -        | 2.9475(7)                              | 3.0830(6)                                         | 2.8877(8)                                         | 2.9686(6)                                                         | 2.8478(3)                                                         |
| Na(1)-S(1)-S1*      | -        | -                                      | -                                                 | -                                                 | 2.8428(6)                                                         | -                                                                 |
| Na(2)-S(1)          | -        | -                                      | -                                                 | -                                                 | -                                                                 | 2.8999(3)                                                         |
| Na(2)-S(4)          | -        | 2.8855(7)                              | 2.9149(6)                                         | -                                                 | -                                                                 | -                                                                 |
| Na(1)-N(1)          | -        | 2.4145(14)                             | 2.3968(12)                                        | 2.4316(15)                                        | 2.4026(11)                                                        | 2.5637(11)                                                        |
| Na(2)-N(2)          | -        | 2.4072(14)                             | 2.4022(12)                                        | -                                                 | -                                                                 | -                                                                 |
| Na...Na             | -        | -                                      | -                                                 | -                                                 | 5.7382(7)                                                         | 3.84075(15)                                                       |
| Na-O <sub>sol</sub> | -        | 2.3317(12) -<br>2.4470(12)             | 2.3176(10) -<br>2.4422(11)                        | 2.352(14) -<br>2.50(3)                            | 2.24(2) -<br>2.332(14)                                            | 2.3832(9) -<br>2.4865(9)                                          |
| S(1)-C(1)           | 1.646(2) | 1.6975(16)                             | 1.6919(13)                                        | 1.7024(17)                                        | 1.7131(12)                                                        | 1.7200(13)                                                        |
| S(2)-C(2)           | 1.743(2) | 1.7452(16)                             | 1.7370(13)                                        | 1.7386(16)                                        | 1.7436(12)                                                        | 1.7428(13)                                                        |
| S(2)-C(1)           | 1.765(2) | 1.7843(15)                             | 1.7886(13)                                        | 1.7703(17)                                        | 1.7755(12)                                                        | 1.7614(13)                                                        |
| S(3)-C(6)           | 1.742(2) | 1.7435(16)                             | 1.7383(13)                                        | -                                                 | -                                                                 | -                                                                 |
| S(3)-C(8)           | 1.756(2) | 1.7866(16)                             | 1.7881(13)                                        | -                                                 | -                                                                 | -                                                                 |
| S(4)-C(8)           | 1.651(2) | 1.6994(16)                             | 1.6952(14)                                        | -                                                 | -                                                                 | -                                                                 |
| N(1)-C(1)           | 1.354(3) | 1.3175(19)                             | 1.3203(16)                                        | 1.322(2)                                          | 1.3127(15)                                                        | 1.3145(16)                                                        |
| N(1)-C(3)           | 1.391(2) | 1.3863(19)                             | 1.3783(16)                                        | 1.3826(19)                                        | 1.3908(15)                                                        | 1.3952(16)                                                        |
| N(2)-C(8)           | 1.354(3) | 1.3154(19)                             | 1.3206(16)                                        | -                                                 | -                                                                 | -                                                                 |
| N(2)-C(7)           | 1.382(3) | 1.3842(19)                             | 1.3800(16)                                        | -                                                 | -                                                                 | -                                                                 |
| F(1)-C(4)           | 1.347(2) | -                                      | 1.3594(14)                                        | -                                                 | -                                                                 | -                                                                 |
| F(2)-C(5)           | 1.353(2) | -                                      | 1.3588(14)                                        | -                                                 | -                                                                 | -                                                                 |
| Angles, °           |          |                                        |                                                   |                                                   |                                                                   |                                                                   |
| N(1)-Na(1)-S(1)     | -        | 59.44(3)                               | 57.22(3)                                          | 60.42(3)                                          | 58.97(3)                                                          | 60.10(2)                                                          |
| N(1)-Na(1)-         | -        | -                                      | -                                                 | -                                                 | 91.32(3)                                                          | -                                                                 |

|                          |            |            |            |            |             |            |
|--------------------------|------------|------------|------------|------------|-------------|------------|
| S(1)-S1*                 |            |            |            |            |             |            |
| N(1)-Na(1)-<br>N(1)-S2*  | -          | -          | -          | -          | -           | 180.0      |
| N(1)-Na(1)-<br>S(1)-S2*  | -          | -          | -          | -          | -           | 119.90(2)  |
| S(1)-Na(1)-<br>S(1)-S2*  | -          | -          | -          | -          | -           | 180.0      |
| N(2)-Na(2)-<br>S(4)      | -          | 60.55(3)   | 60.04(3)   | -          | -           | -          |
| S(1)-Na(2)-<br>S(1)-S3*  | -          | -          | -          | -          | -           | 180.0      |
| Na(1)-S(1)-<br>Na(1)-S4* | -          | -          | -          | -          | 161.793(12) | -          |
| Na(1)-S(1)-<br>Na(2)     | -          | -          | -          | -          | --          | 83.855(9)  |
| Na(2)-O(1)-<br>Na(1)     | -          | -          | -          | -          | -           | 101.17(3)  |
| C(1)-S(1)-<br>Na(1)      | -          | 73.19(5)   | 71.52(5)   | 74.53(6)   | 73.49(4)    | 76.37(4)   |
| C(1)-S(1)-<br>Na(2)      | -          | -          | -          | -          | -           | 83.855(9)  |
| C(8)-S(4)-<br>Na(2)      | -          | 73.56(5)   | 73.43(5)   | -          | -           | -          |
| C(1)-N(1)-<br>Na(1)      | -          | 100.05(9)  | 104.38(8)  | 98.54(10)  | 102.45(7)   | 93.90(8)   |
| C(8)-N(2)-<br>Na(2)      | -          | 98.29(9)   | 99.41(8)   | -          | -           | -          |
| C(2)-S(2)-<br>C(1)       | 91.68(10)  | 90.29(7)   | 90.01(6)   | 90.22(8)   | 90.03(5)    | 90.18(6)   |
| C(6)-S(3)-<br>C(8)       | 91.54(10)  | 90.32(7)   | 90.03(6)   | -          | -           | -          |
| S(1)-C(1)-<br>S(2)       | 123.10(13) | 120.26(9)  | 126.28(10) | 120.35(10) | 121.11(7)   | 118.14(7)  |
| S(4)-C(8)-<br>S(3)       | 123.71(12) | 120.31(9)  | 126.39(10) | -          | -           | -          |
| C(1)-N(1)-<br>C(3)       | 115.65(18) | 112.50(13) | 112.06(11) | 111.67(13) | 111.93(10)  | 110.97(10) |
| C(8)-N(2)-<br>C(7)       | 115.92(18) | 112.71(13) | 111.95(11) | -          | -           | -          |

\* - Symmetry code: (\$1)  $-x+1, y+1/2, -z+3/2$ ; (\$2)  $-x, -y+1, -z+1$ ; (\$3)  $-x+1, -y+1, -z+1$ ; (\$4)  $-x+1, y-1/2, -z+3/2$ .

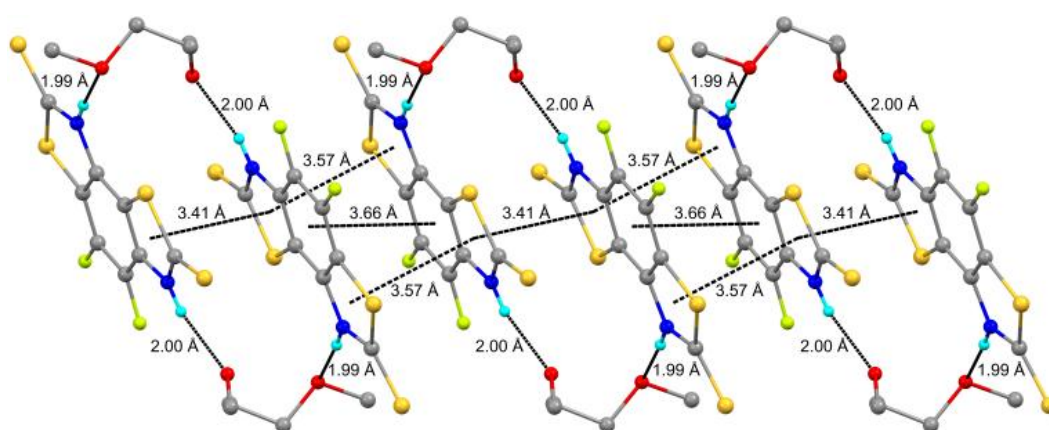

**Figure 1S.** Fragment of the crystal packing of **1**. The hydrogen atoms except H(1) and H(2) are omitted for clarity.

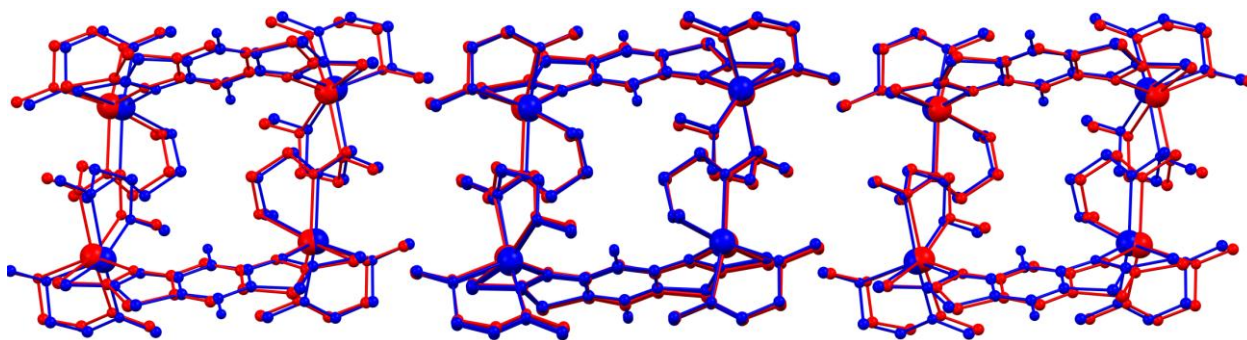

**Figure 2S.** The overlay of crystal packing of  $\text{Na}_2\text{dmbt}(\text{DME})_4$  and  $\text{Na}_2\text{L}^2(\text{DME})_4$  (blue).

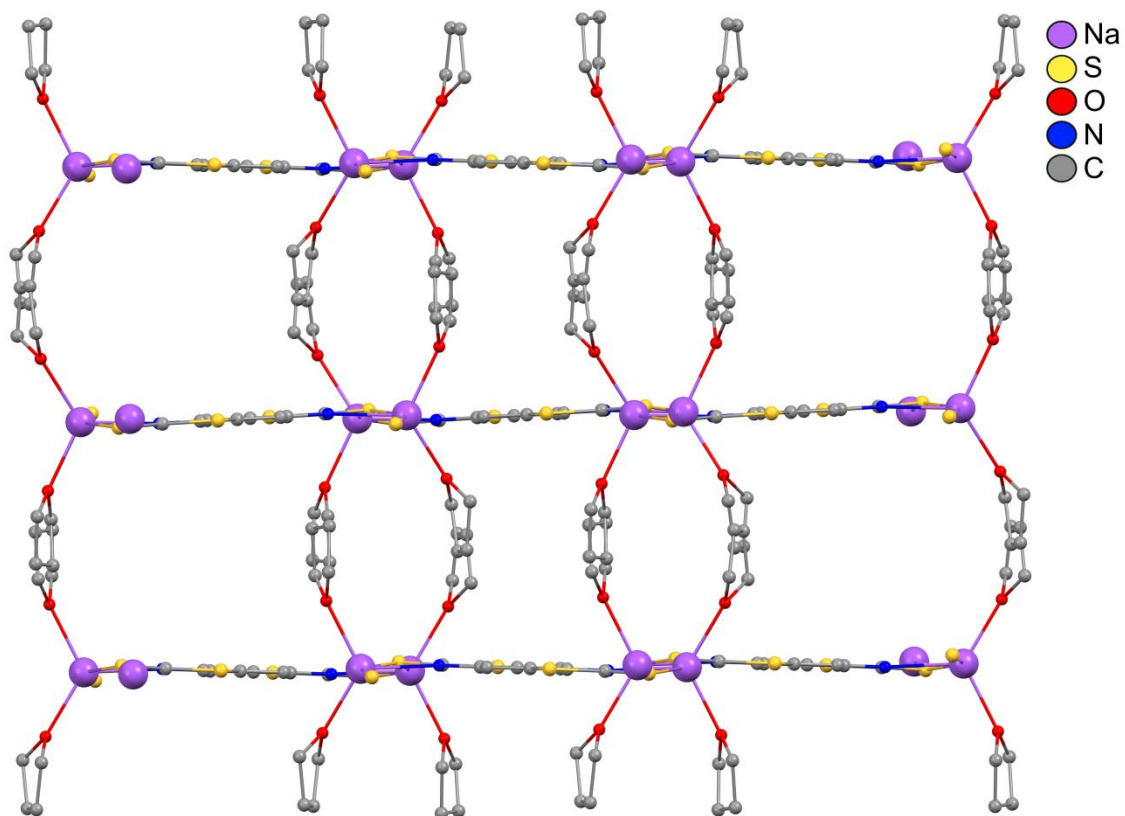

**Figure 3S.** Fragment of the crystal packing of  $[\text{Na}_2\text{L}^4(\text{THF})_4]_n$ . The hydrogen atoms are omitted for clarity.

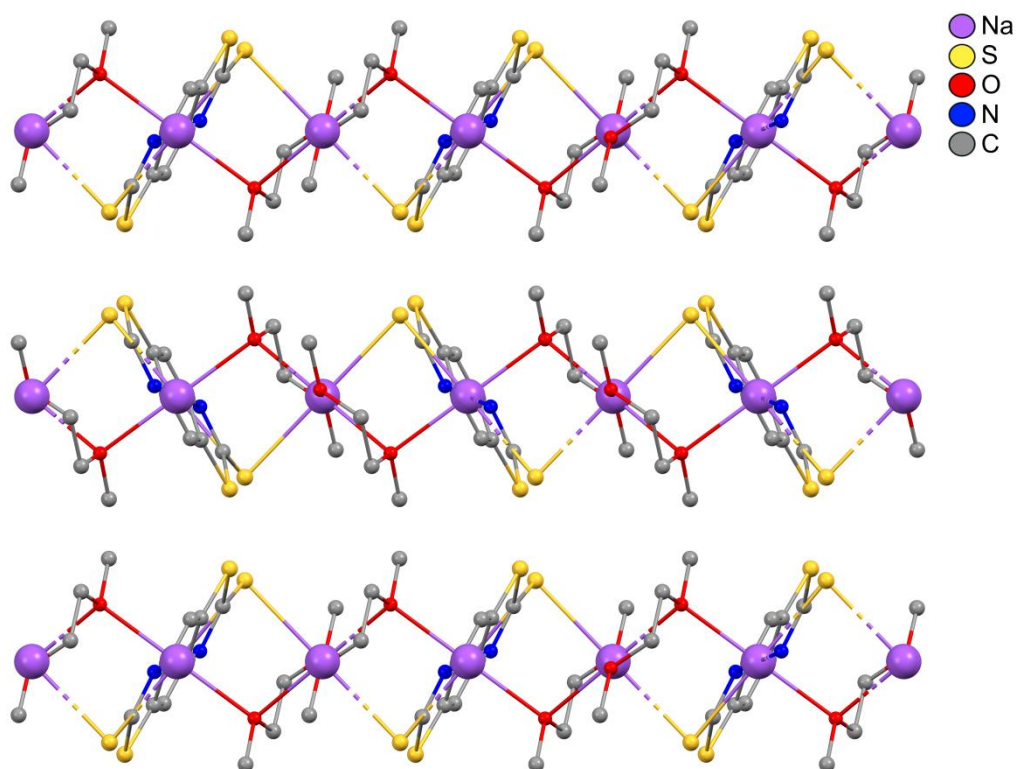

**Figure 4S.** Fragment of the crystal packing of  $[\text{Na}_2\text{L}^4(\text{DME})_2]_n$ . The hydrogen atoms are omitted for clarity.

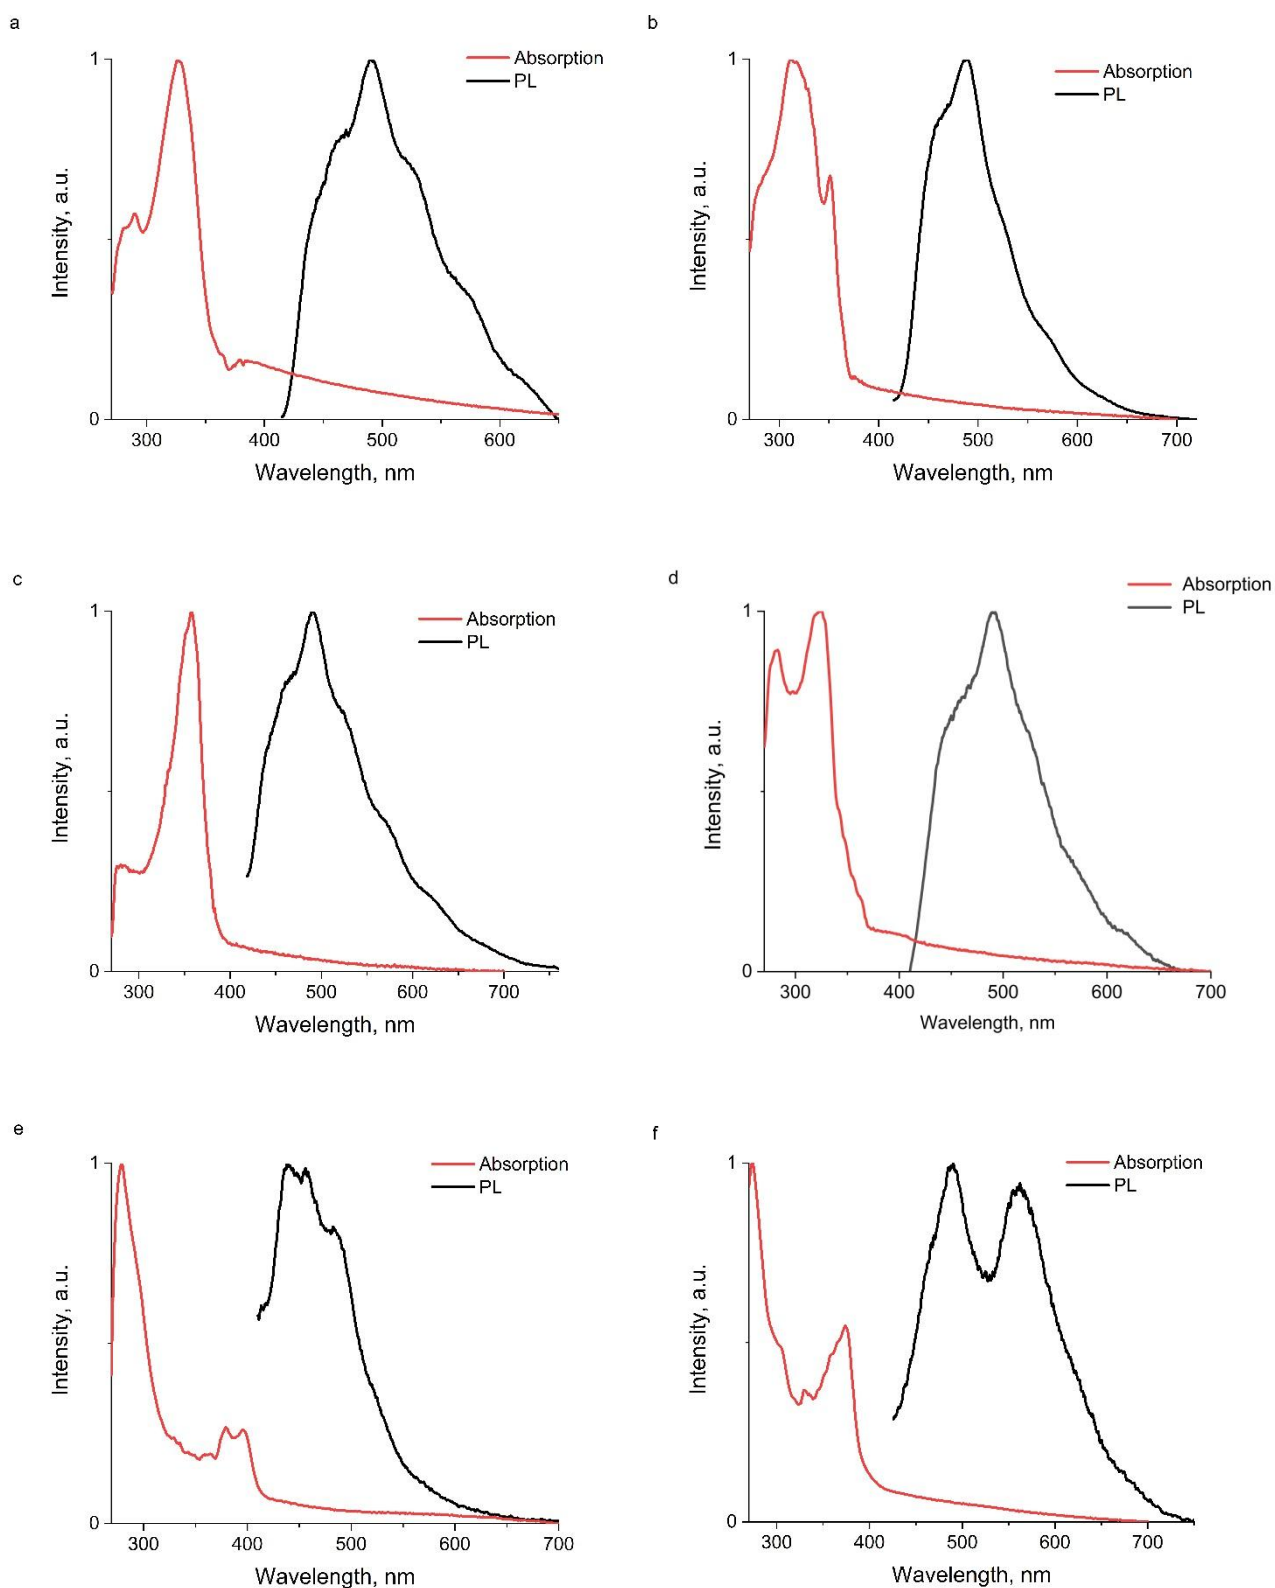

**Figure 5S.** Absorption and PL spectra of  $\text{Na}_2\text{L}^1(\text{DME})_4$  (a),  $\text{Na}_2\text{L}^2(\text{DME})_4$  (b),  $\text{Na}_2\text{L}^3(\text{DME})_4$  (c),  $[\text{Na}_2\text{L}^4(\text{DME})_2]_n$  (d),  $\text{Na}_2\text{L}^5(\text{DME})_4$  (e),  $\text{Na}_2\text{dmbt}(\text{DME})_4$  (f) at 298 K.

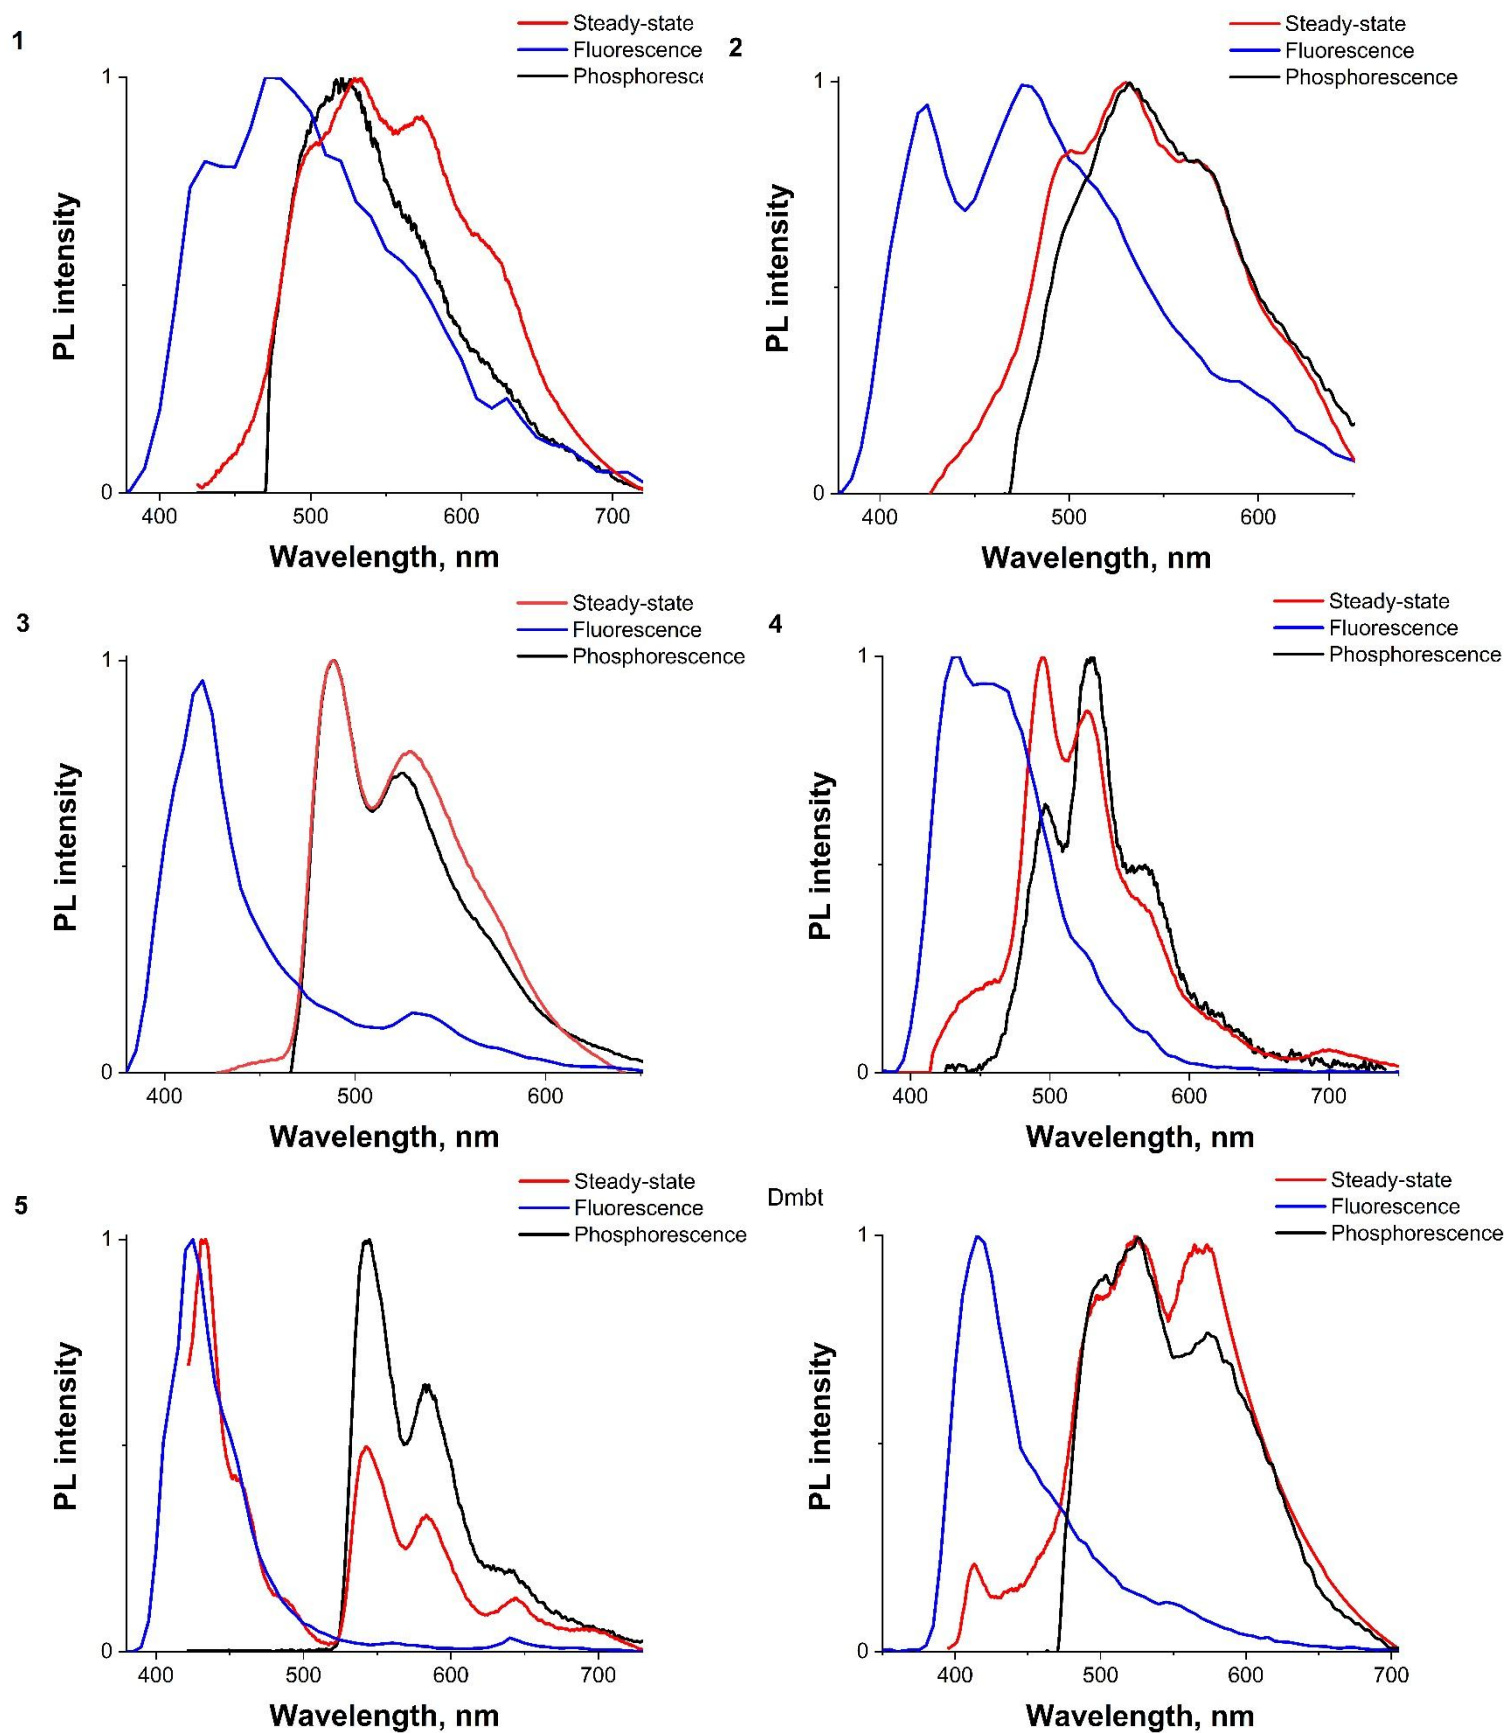

**Figure 6S.** Steady-state, fluorescence and phosphorescence PL spectra of disodium salts of bithiazoles H<sub>2</sub>(dmbt) and **1-5** in DME solutions at 77 K.

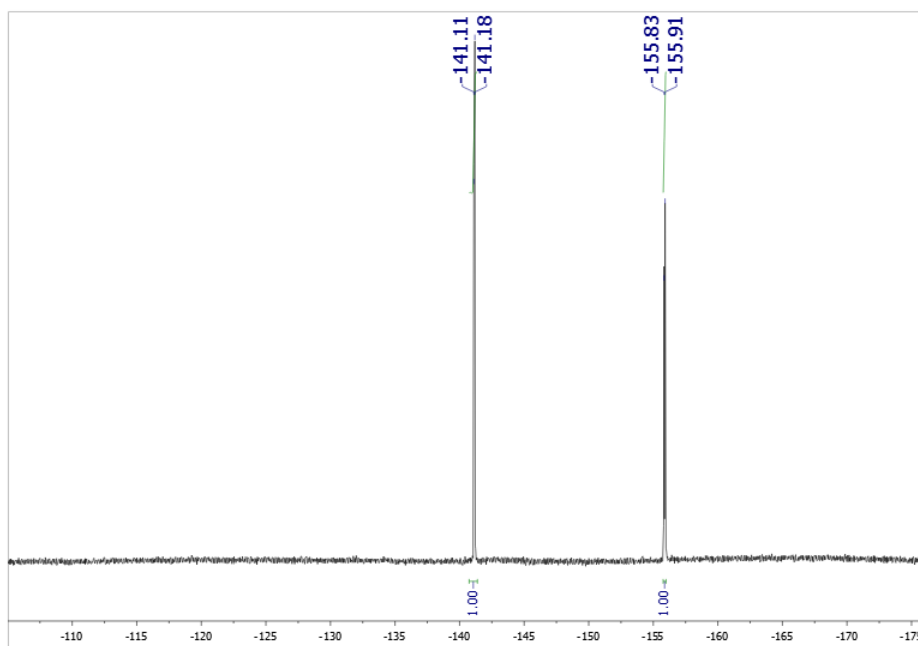

**Figure 7S.**  $^{19}\text{F}$  NMR spectrum of **1** in DME.

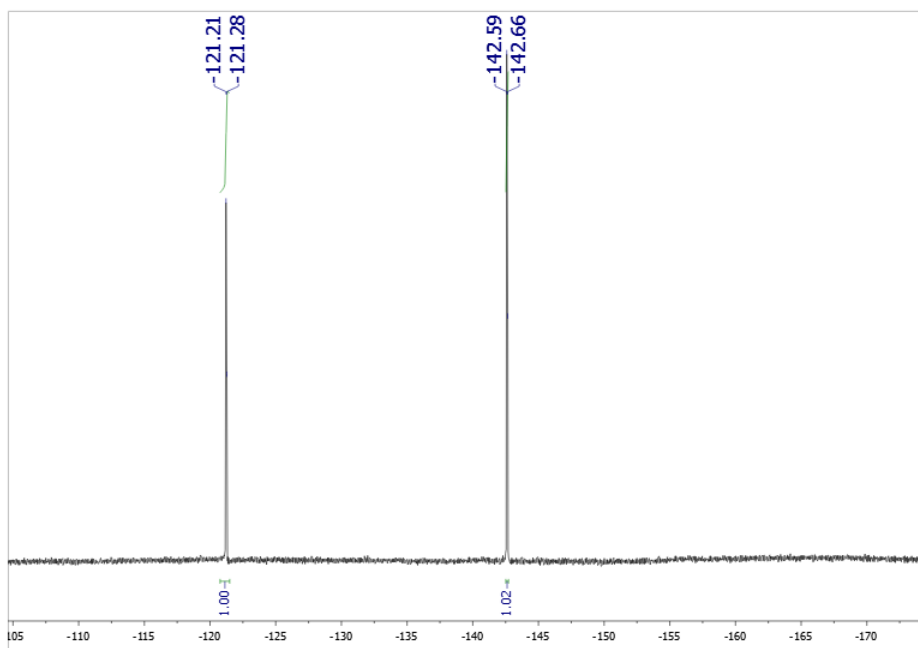

**Figure 8S.**  $^{19}\text{F}$  NMR spectrum of **2** in DME



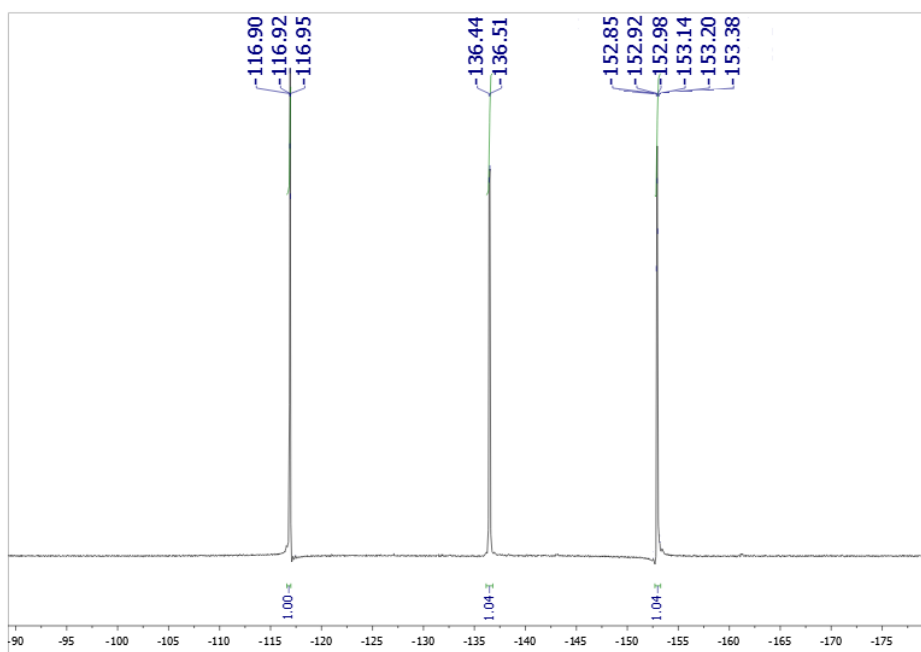

**Figure 9S.**  $^{19}\text{F}$  NMR spectrum of **3** in DME.

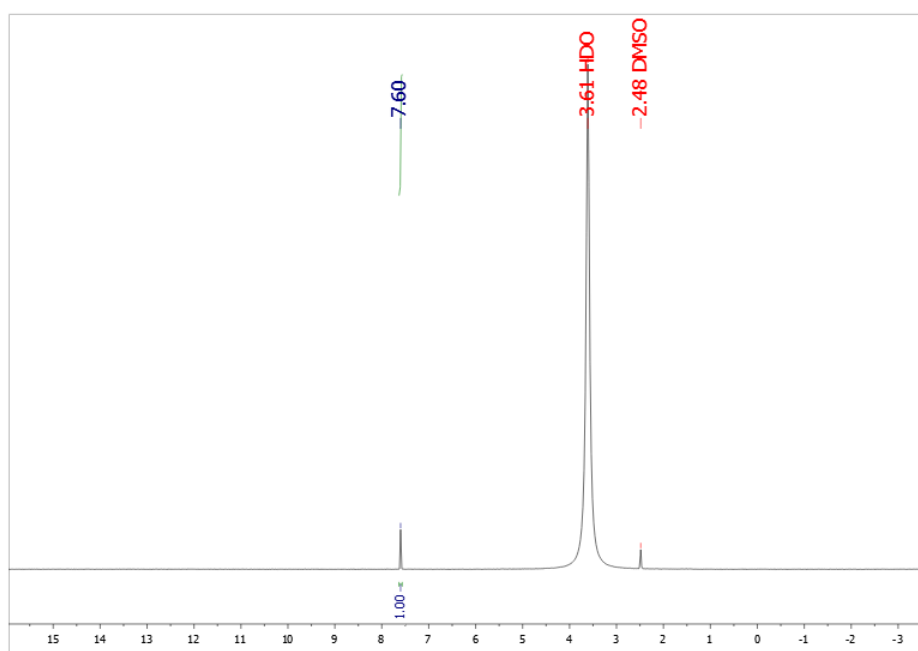

**Figure 10S.**  $^1\text{H}$  NMR spectrum of **4** in  $\text{d}_6\text{-DMSO}$ .

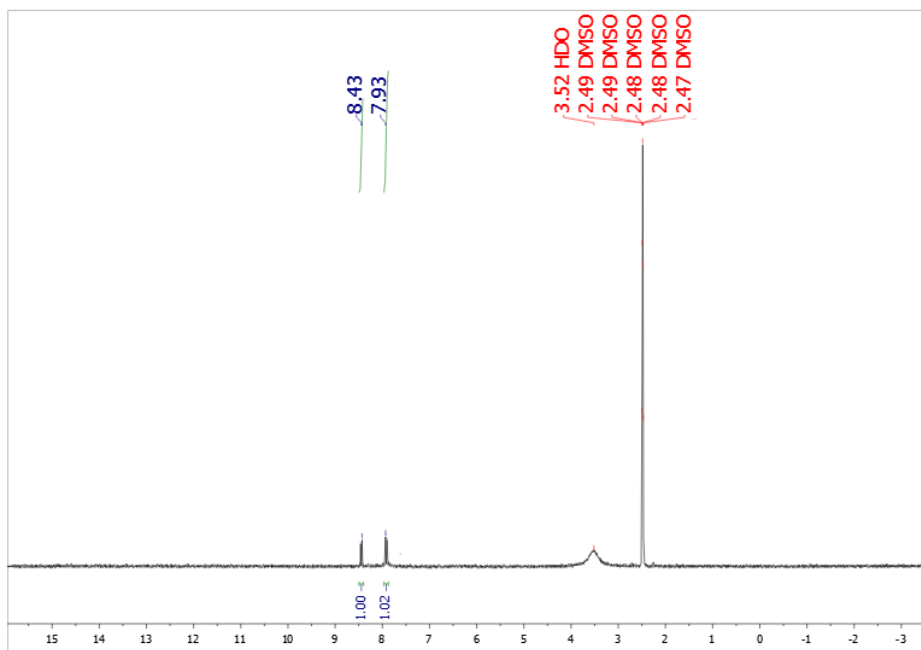

**Figure 11S.**  $^1\text{H}$  NMR spectrum of **5** in  $\text{d}_6\text{-DMSO}$ .

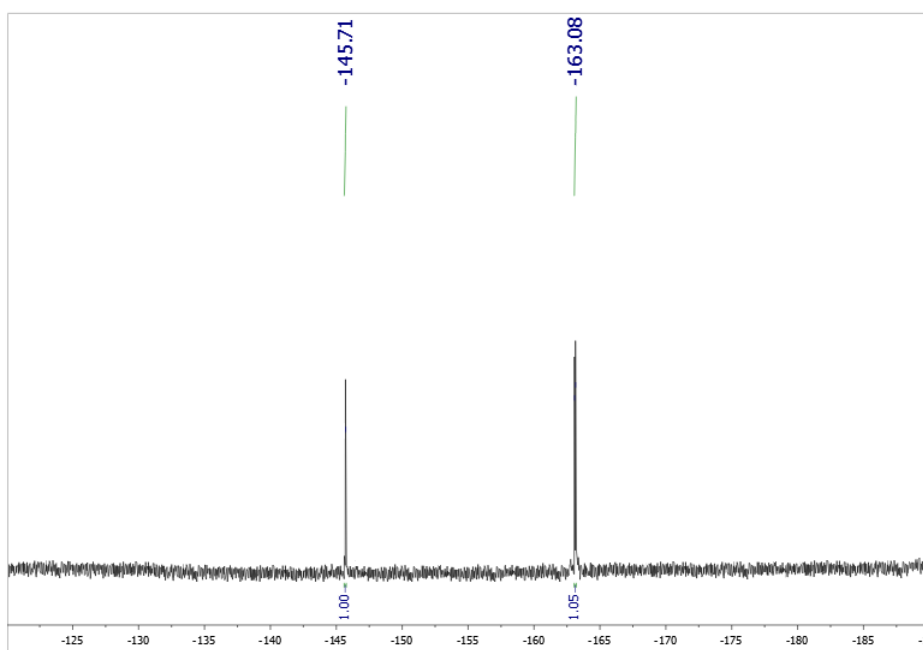

**Figure 12S.**  $^{19}\text{F}$  NMR spectrum of  $\text{Na}_2\text{L}^1(\text{DME})_4$  in DME.

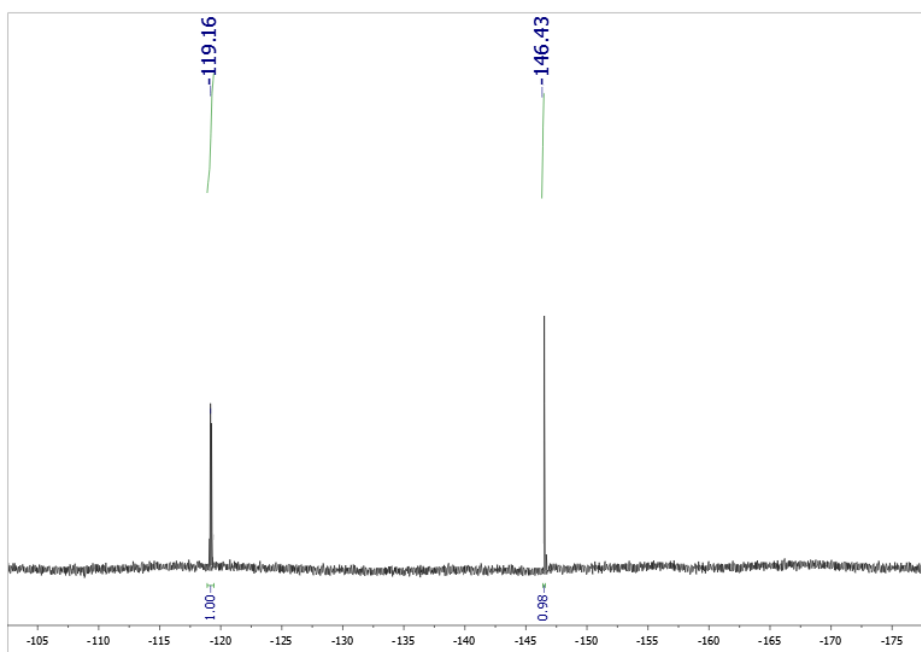

**Figure 13S.**  $^{19}\text{F}$  NMR spectrum of  $\text{Na}_2\text{L}^2(\text{DME})_4$  in DME.

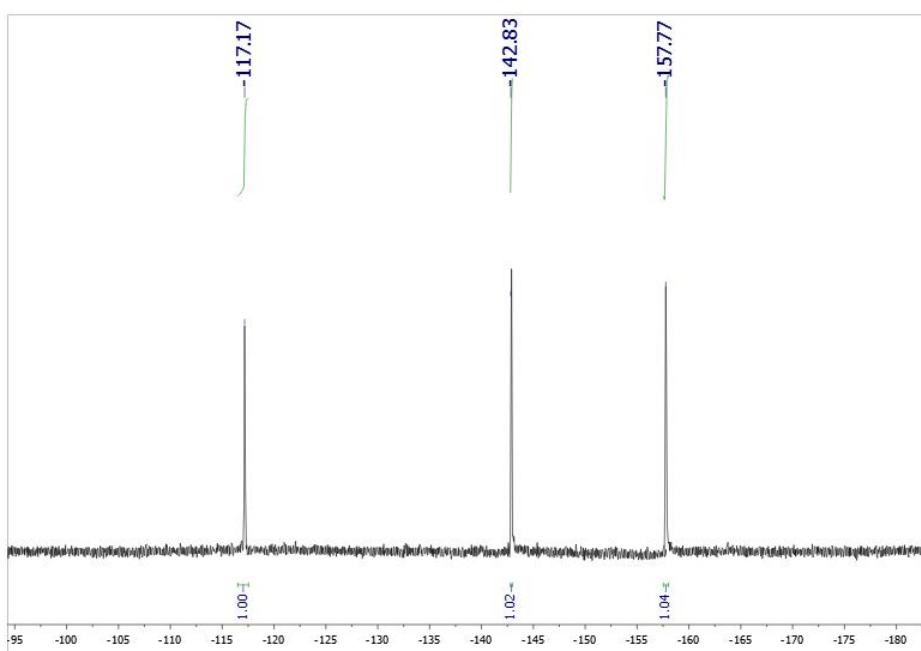

**Figure 14S.**  $^{19}\text{F}$  NMR spectrum of  $\text{Na}_2\text{L}^3(\text{DME})_4$  in DME.

046 Rbogzhin2 #448-485 RT: 3.37-3.62 AV: 38 NL: 2.15E6  
T: + c Full ms [ 50.00-400.00]

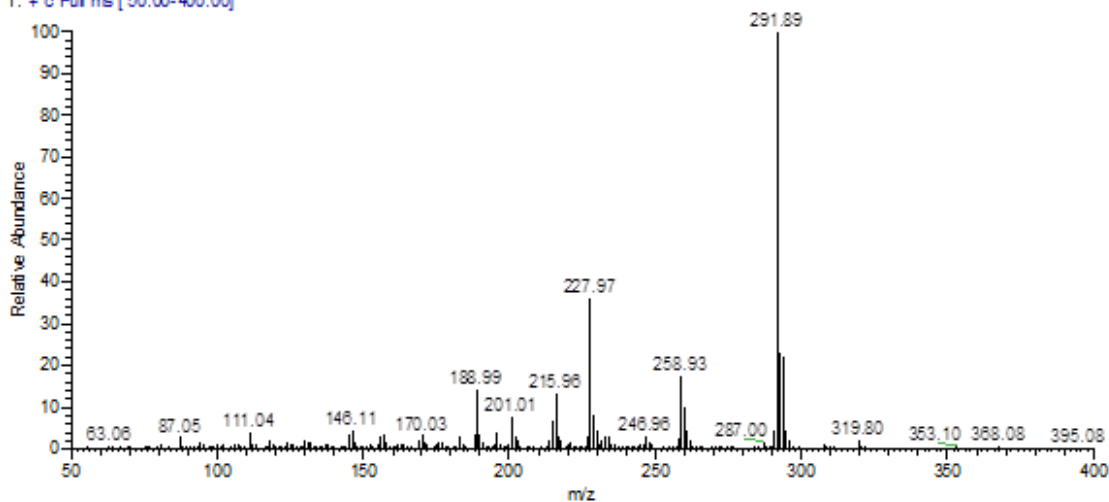

Figure 15S. Mass-spectrum of mixture of 1 and 2.

053 Ilichev1 #327-386 RT: 3.23-3.80 AV: 60 NL: 1.05E6  
T: + c Full ms [ 50.00-700.00]

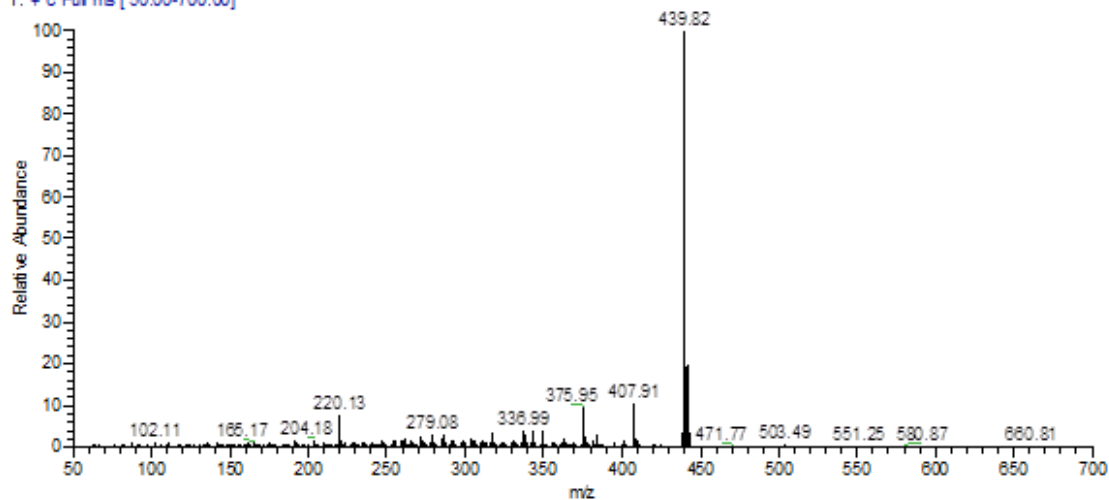

Figure 16S. Mass-spectrum of 3.

036 Rbogzhin1 #585-624 RT: 4.51-4.80 AV: 40 NL: 2.93E5  
T: + c Full ms [ 30.00-400.00]

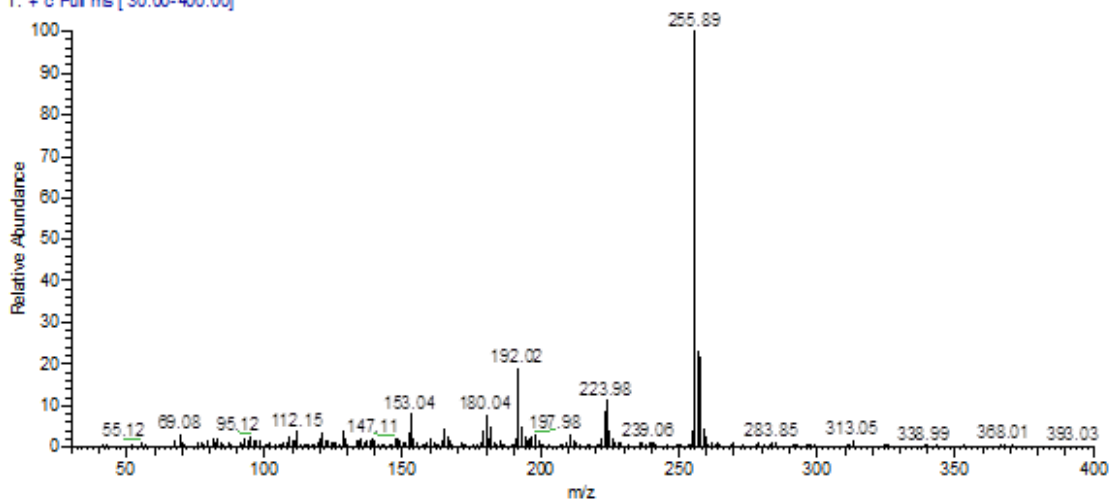

Figure 17S. Mass-spectrum of 4.

015 Rogozhin1 #575-610 RT: 4.86-5.16 AV: 36 NL: 5.18E4  
T: + c Full ms [ 50.00-500.00]

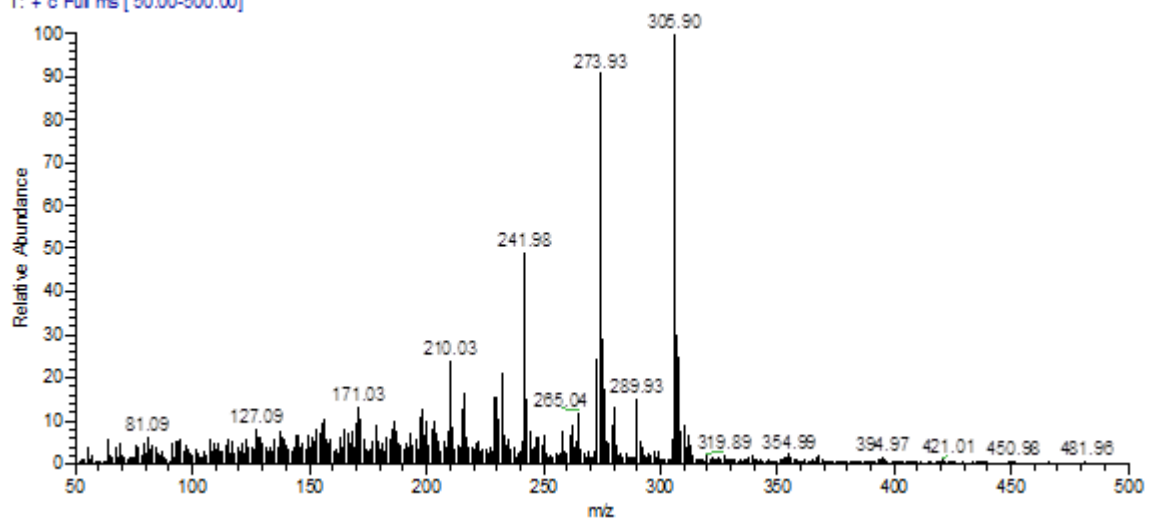

**Figure 18S.** Mass-spectrum of **5**.

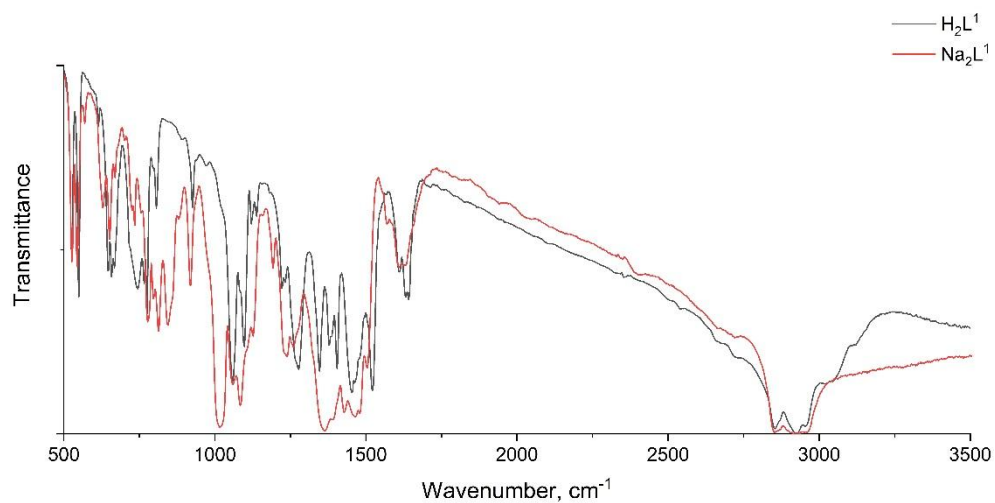

**Figure 19S.** FTIR spectra of **1** and  $\text{Na}_2\text{L}^1(\text{DME})_4$ .

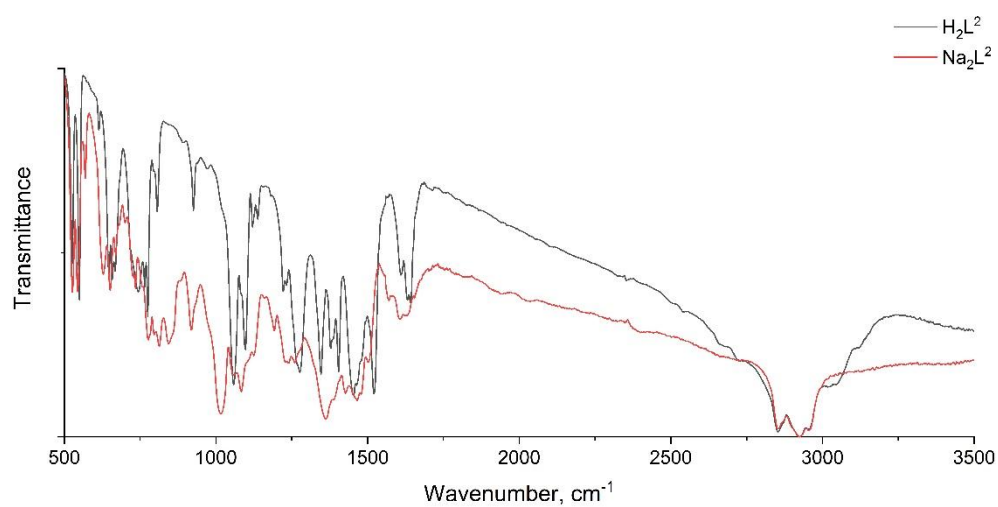

**Figure 20S.** FTIR spectra of **2** and  $\text{Na}_2\text{L}^2(\text{DME})_4$ .

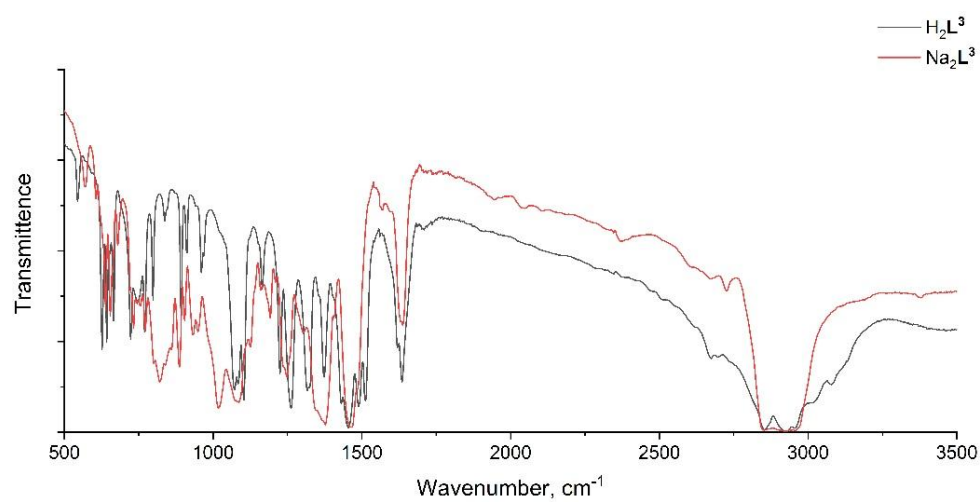

**Figure 21S.** FTIR spectra of **3** and  $\text{Na}_2\text{L}^3(\text{DME})_4$ .

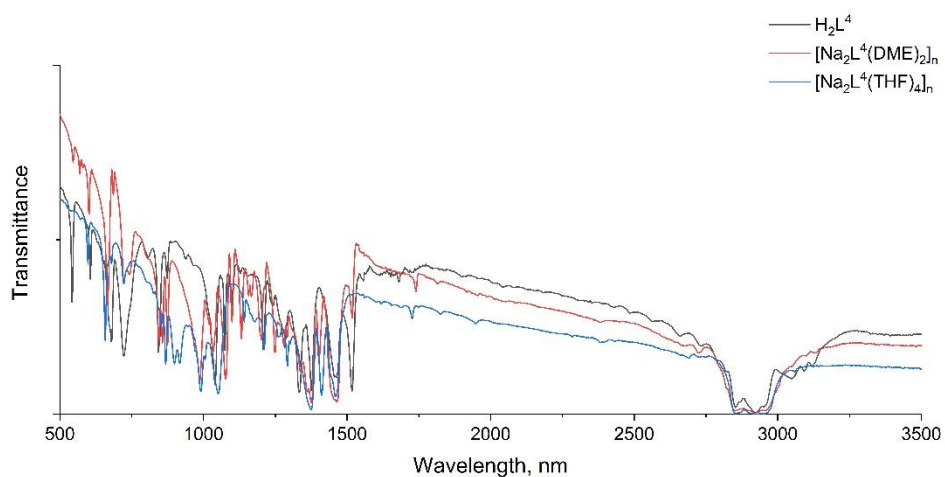

**Figure 22S.** FTIR spectra of **4**,  $[\text{Na}_2\text{L}^4(\text{DME})_2]_n$  and  $[\text{Na}_2\text{L}^4(\text{THF})_4]_n$ .

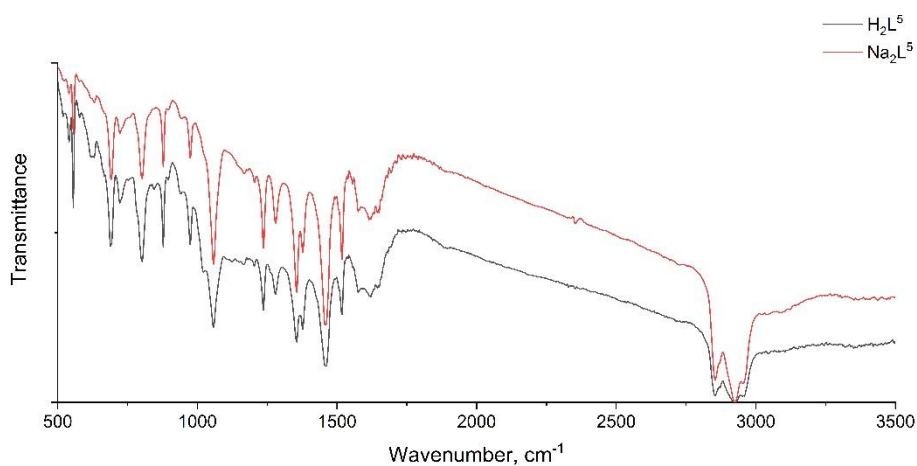

**Figure 23S.** FTIR spectra of **5** and  $\text{Na}_2\text{L}^5(\text{DME})_4$ .

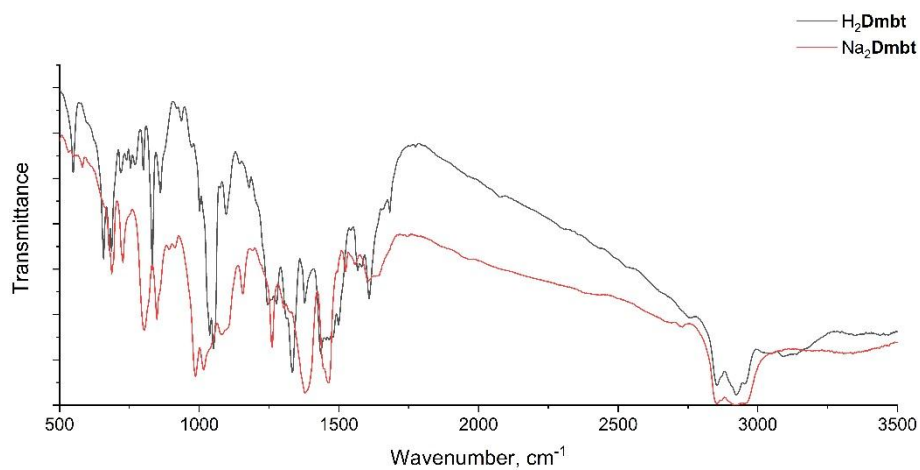

**Figure 24S.** FTIR spectra of  $\text{H}_2(\text{dmbt})$  and  $\text{Na}_2\text{dmbt}(\text{DME})_4$ .
